# Supplementary material for: LncRNA HEPFAL accelerates ferroptosis in hepatocellular carcinoma by regulating SLC7A11 ubiquitination
Source: PubMed Central journal article supplement (PMC9411508; doi:10.1038/s41419-022-05173-1), 2022-08-25
Supplement: 41419_2022_5173_MOESM2_ESM.pdf [file 41419_2022_5173_MOESM2_ESM.pdf]

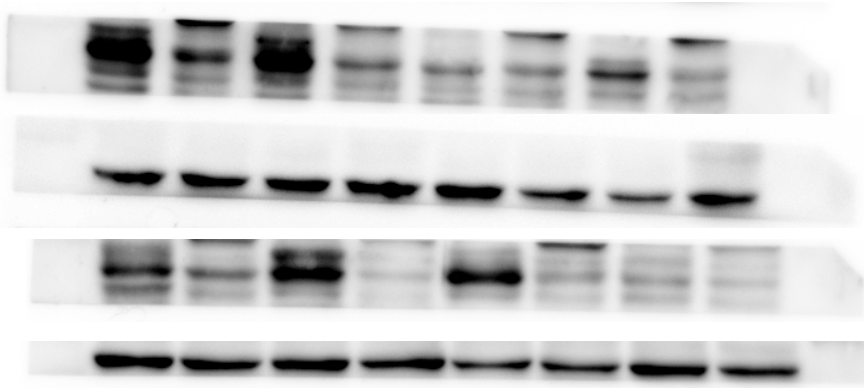

**Figure S8.** original western blots of Figure 1I.

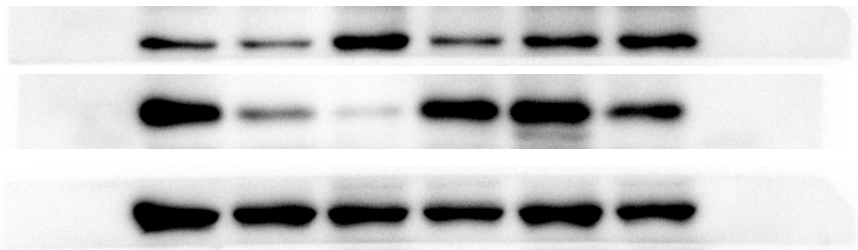

**Figure S9.** original western blots of Figure 2C.

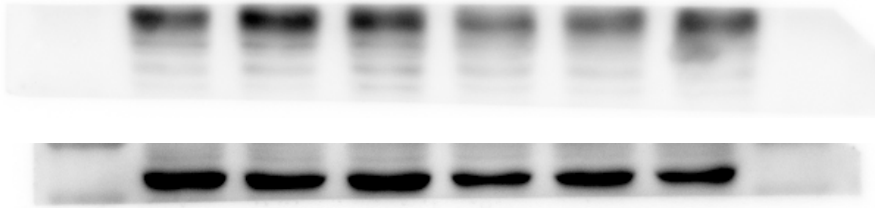

**Figure S10.** original western blots of Figure 2F.

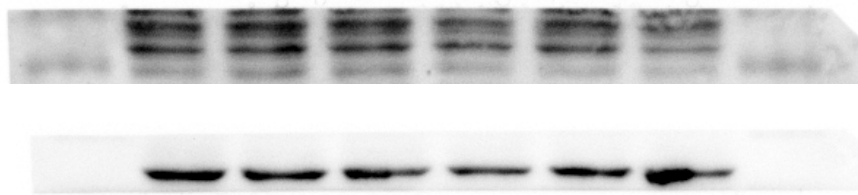

**Figure S11.** original western blots of Figure 2I.

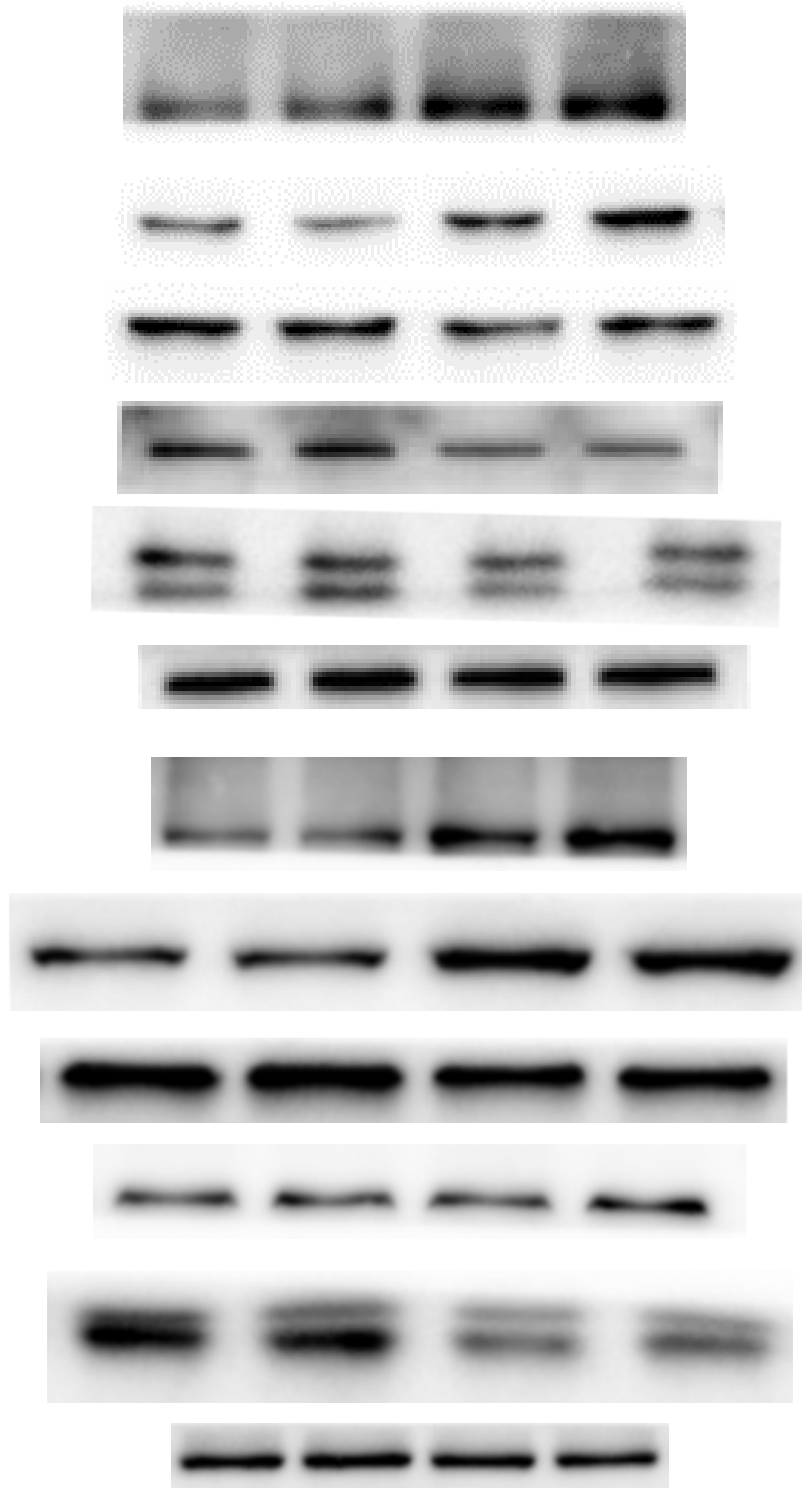

**Figure S12.** original western blots of Figure 3E.

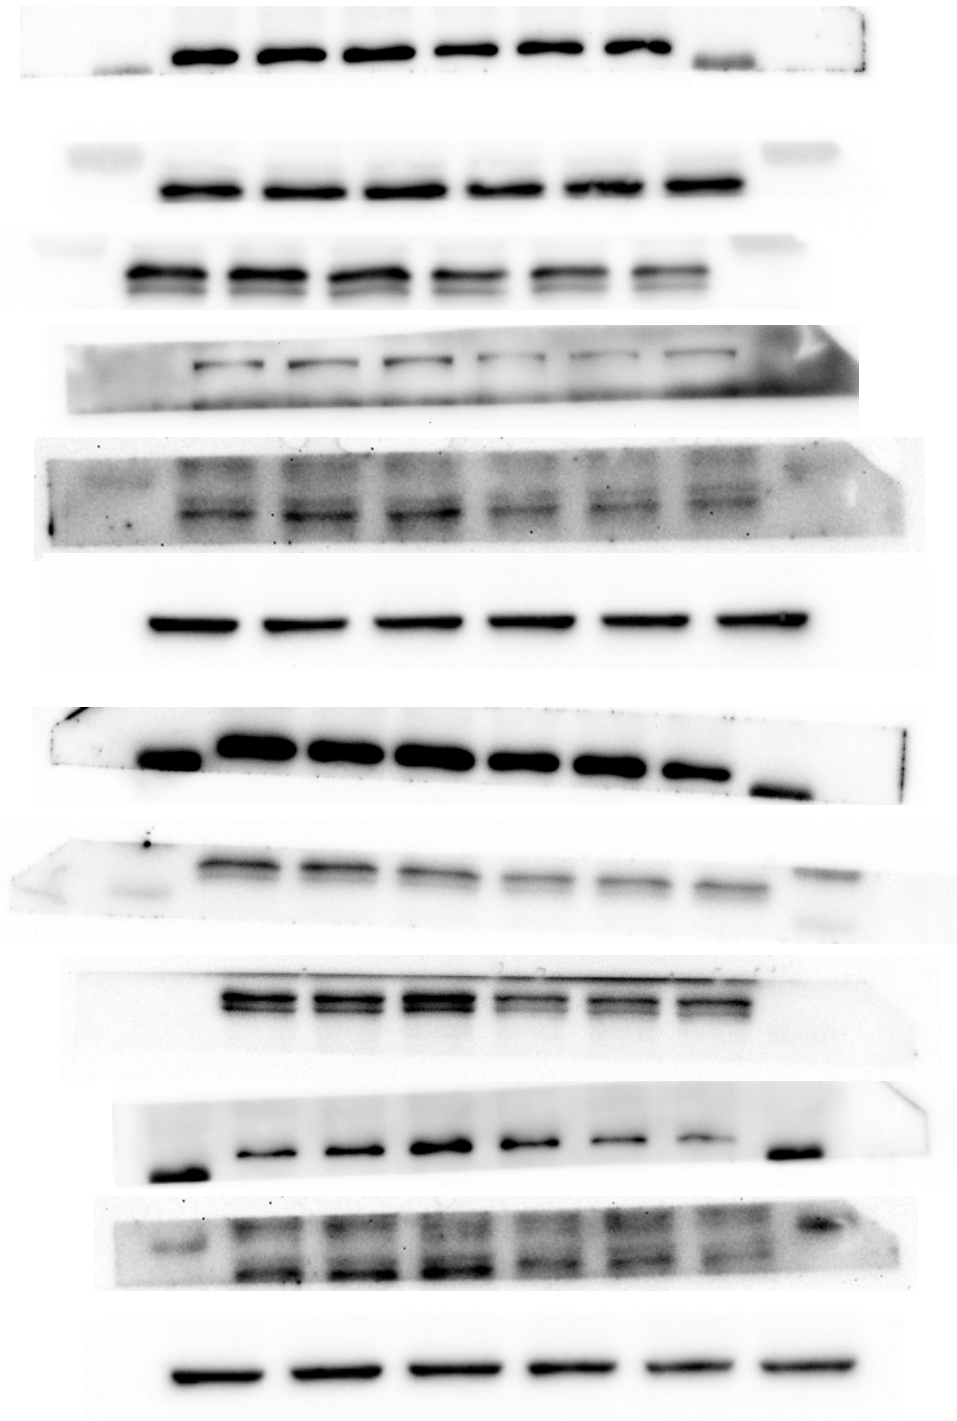

**Figure S13.** original western blots of Figure 4H.

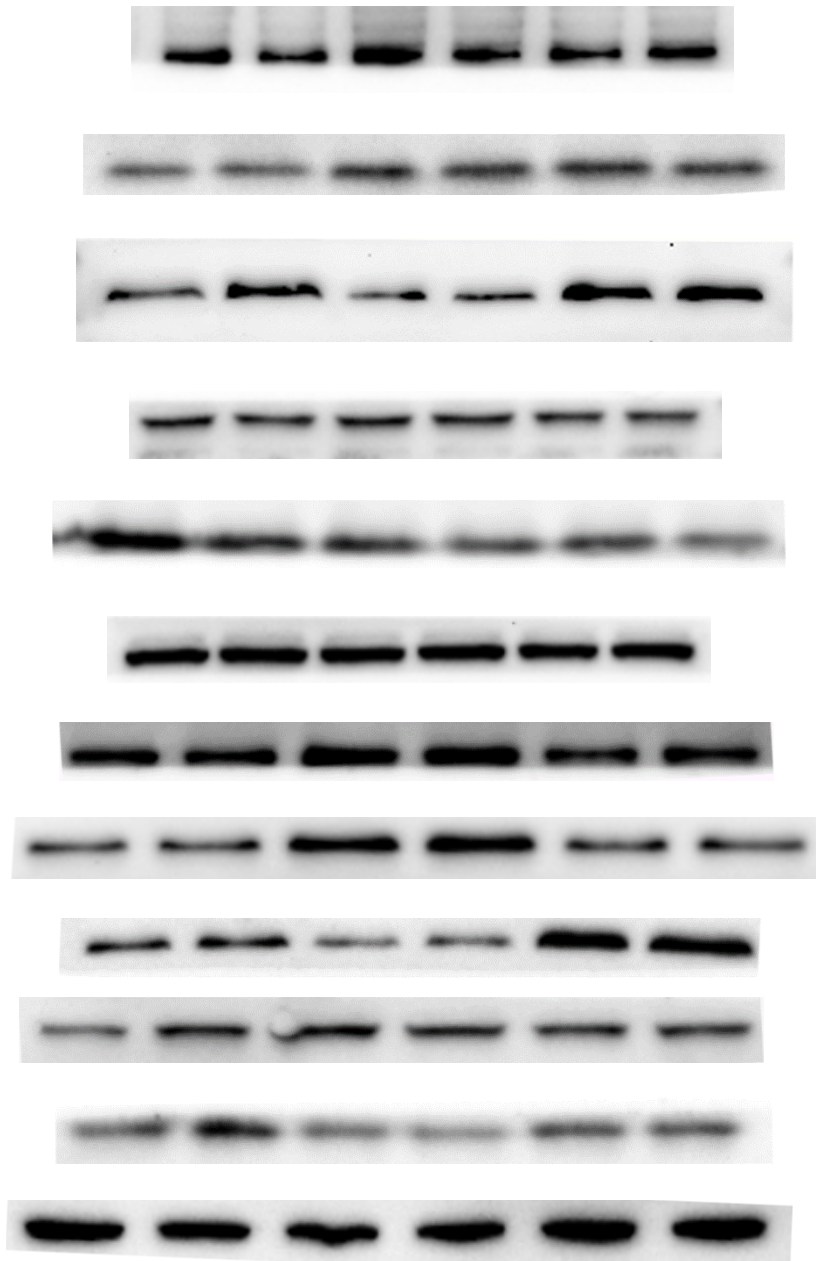

**Figure S14.** original western blots of Figure 5H.

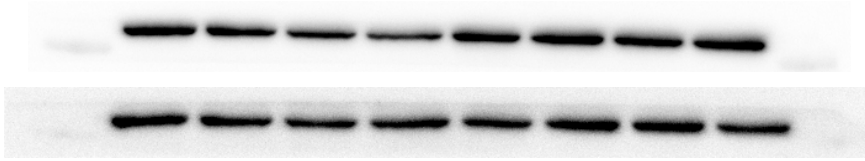

**Figure S15.** original western blots of Figure 6B.

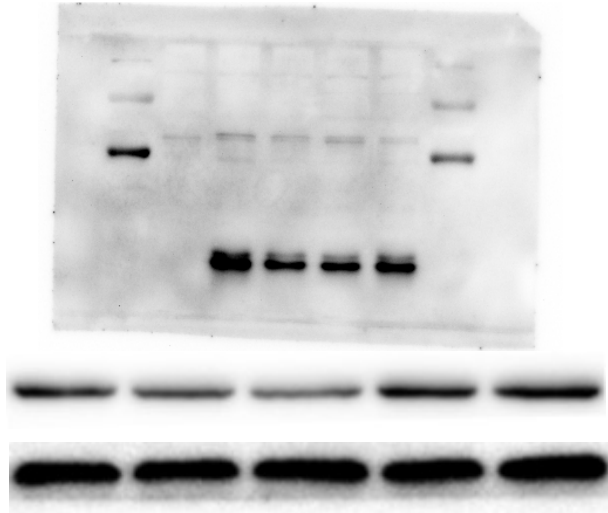

**Figure S16.** original western blots of Figure 6C.

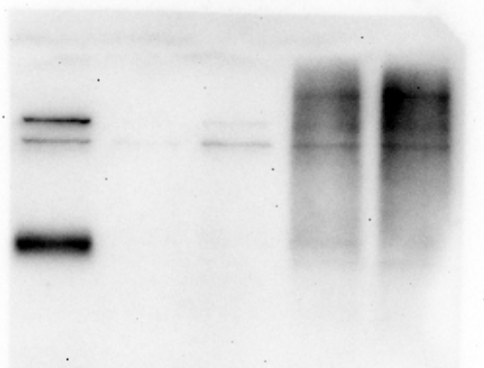

**Figure S17.** original western blots of Figure 6D.

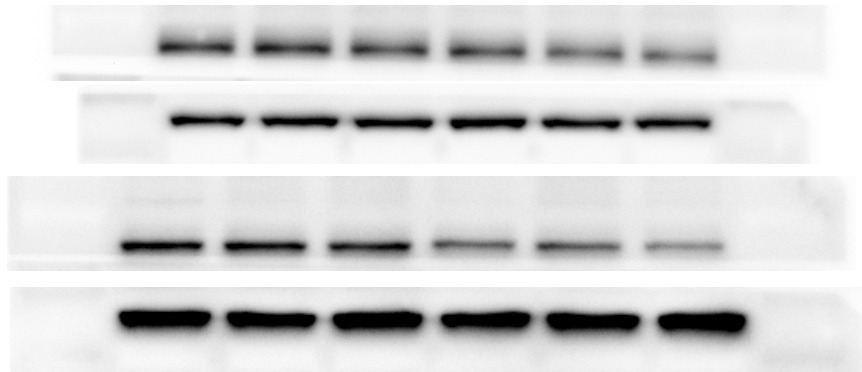

**Figure S18.** original western blots of Figure 6E.

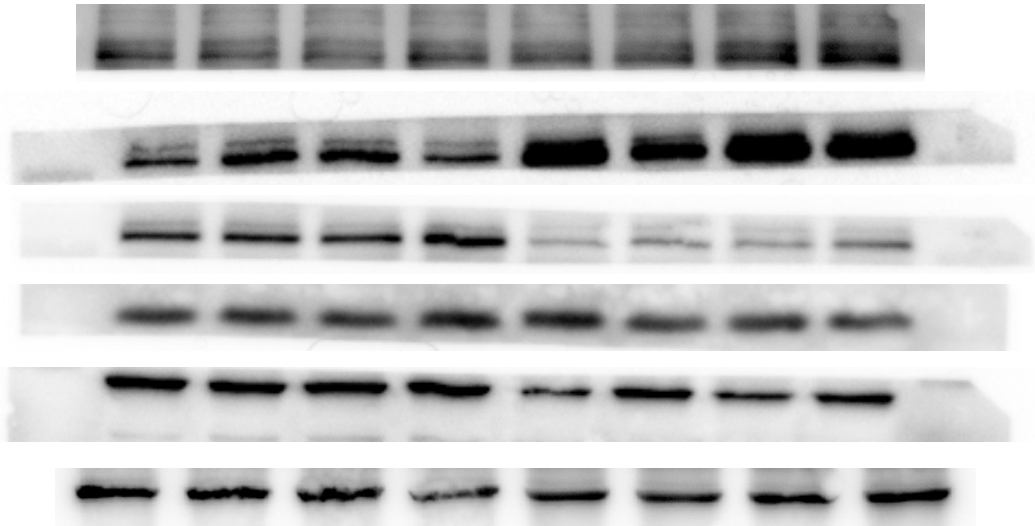

**Figure S19.** original western blots of Figure 7H.

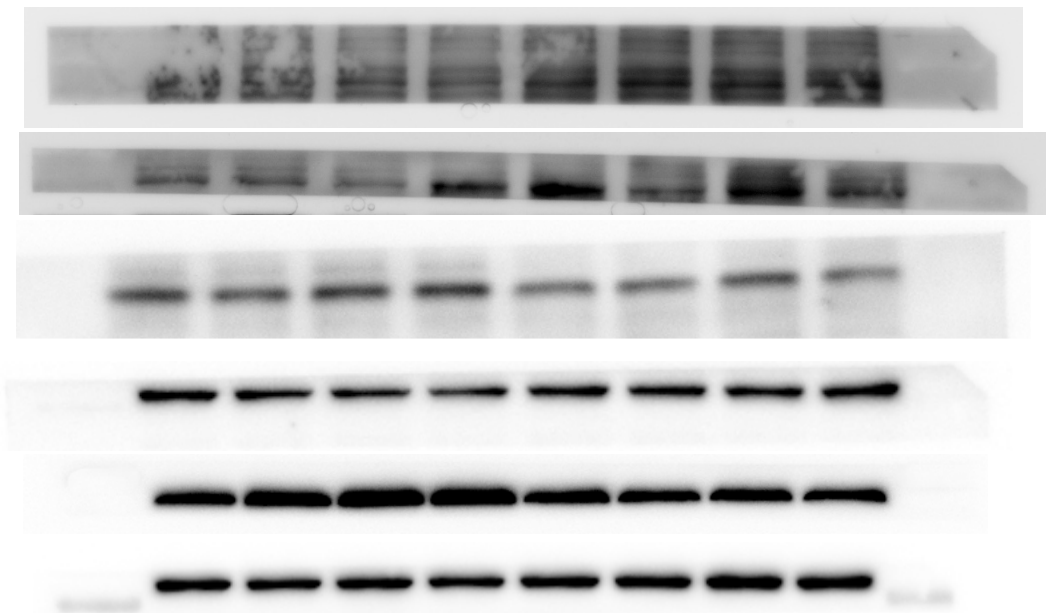

**Figure S20.** original western blots of Figure 7I.
