# Supplementary material for: LncRNA HEPFAL accelerates ferroptosis in hepatocellular carcinoma by regulating SLC7A11 ubiquitination
Source: Cell Death Dis. 2022 Aug 25;13(8):734. doi: 10.1038/s41419-022-05173-1 (PMC9411508; doi:10.1038/s41419-022-05173-1)
Supplement: Supplementary file 1 — Supplementary information [file 41419_2022_5173_MOESM1_ESM.pdf]

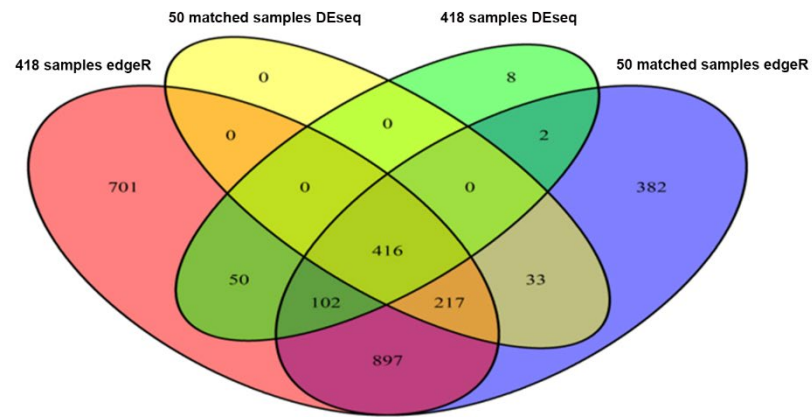

**Figure S1.** DEseq and edgeR differential expression analysis on 368 samples and 50 paired samples to filter lncRNAs.

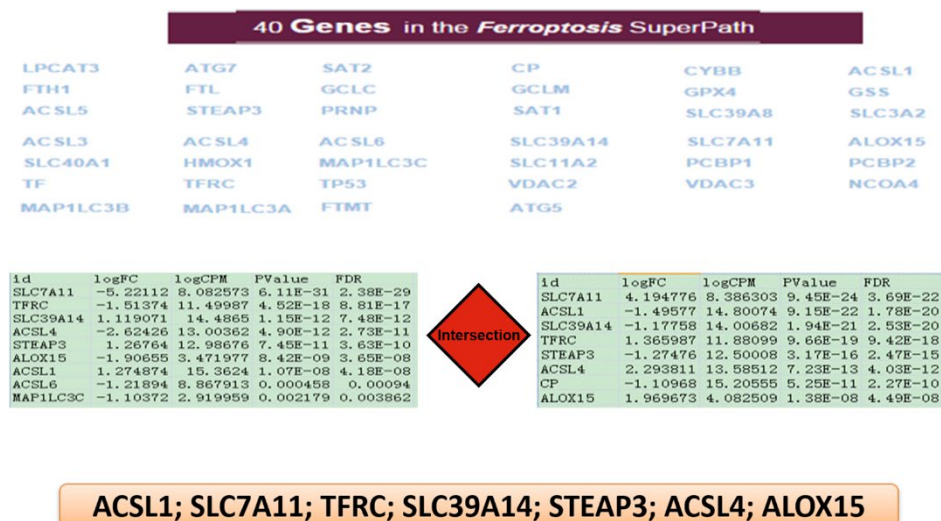

**Figure S2.** edgeR differential expression analysis on 368 samples and 50 paired samples to filter ferroptosis-related genes.

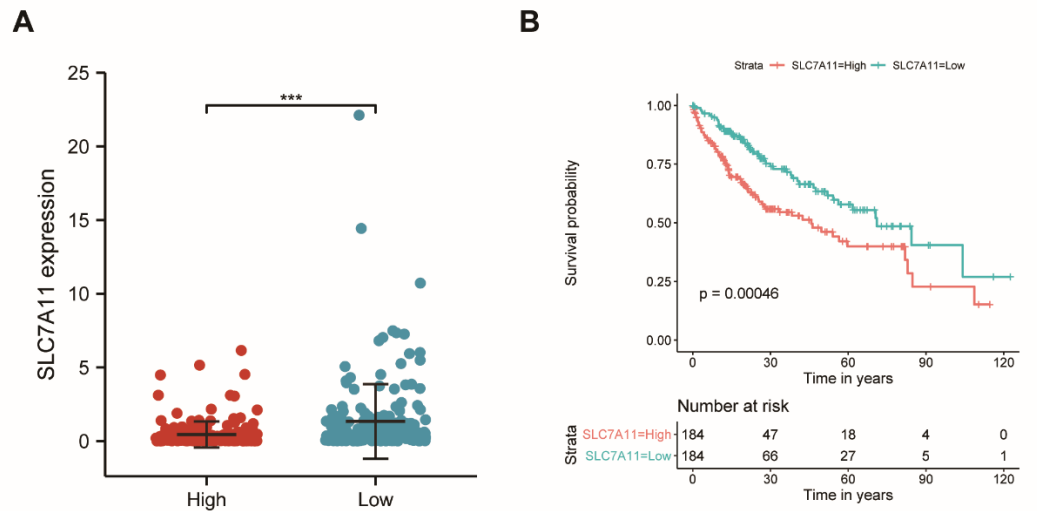

**Figure S3.** SLC7A11 is associated with LncRNA HEPFAL and affects the prognosis of patients. **A)** Expression of SLC7A11 in high and low expression LncRNA tissues. **B)** SLC7A11 affects OS in HCC patients.

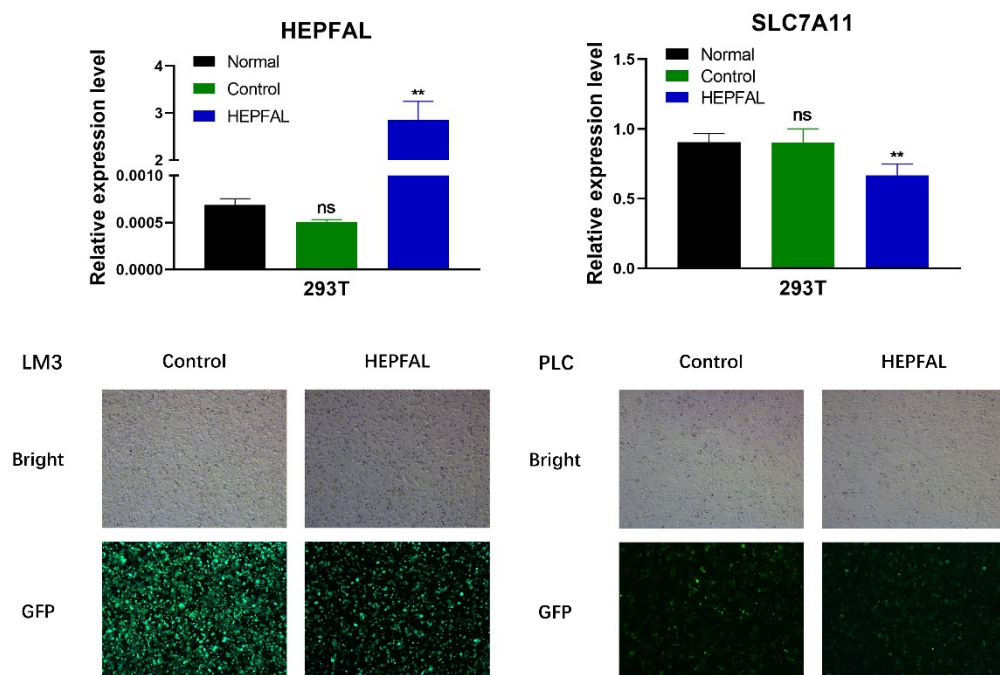

**Figure S4.** Relative expression of lncRNA HEPFAL and SLC7A11 in 293T cells transfected with lncRNA HEPFAL expression vector and control vector was detected by qRT-PCR. And GFP fluorescence in cells after overexpression lncRNA HEPFAL.

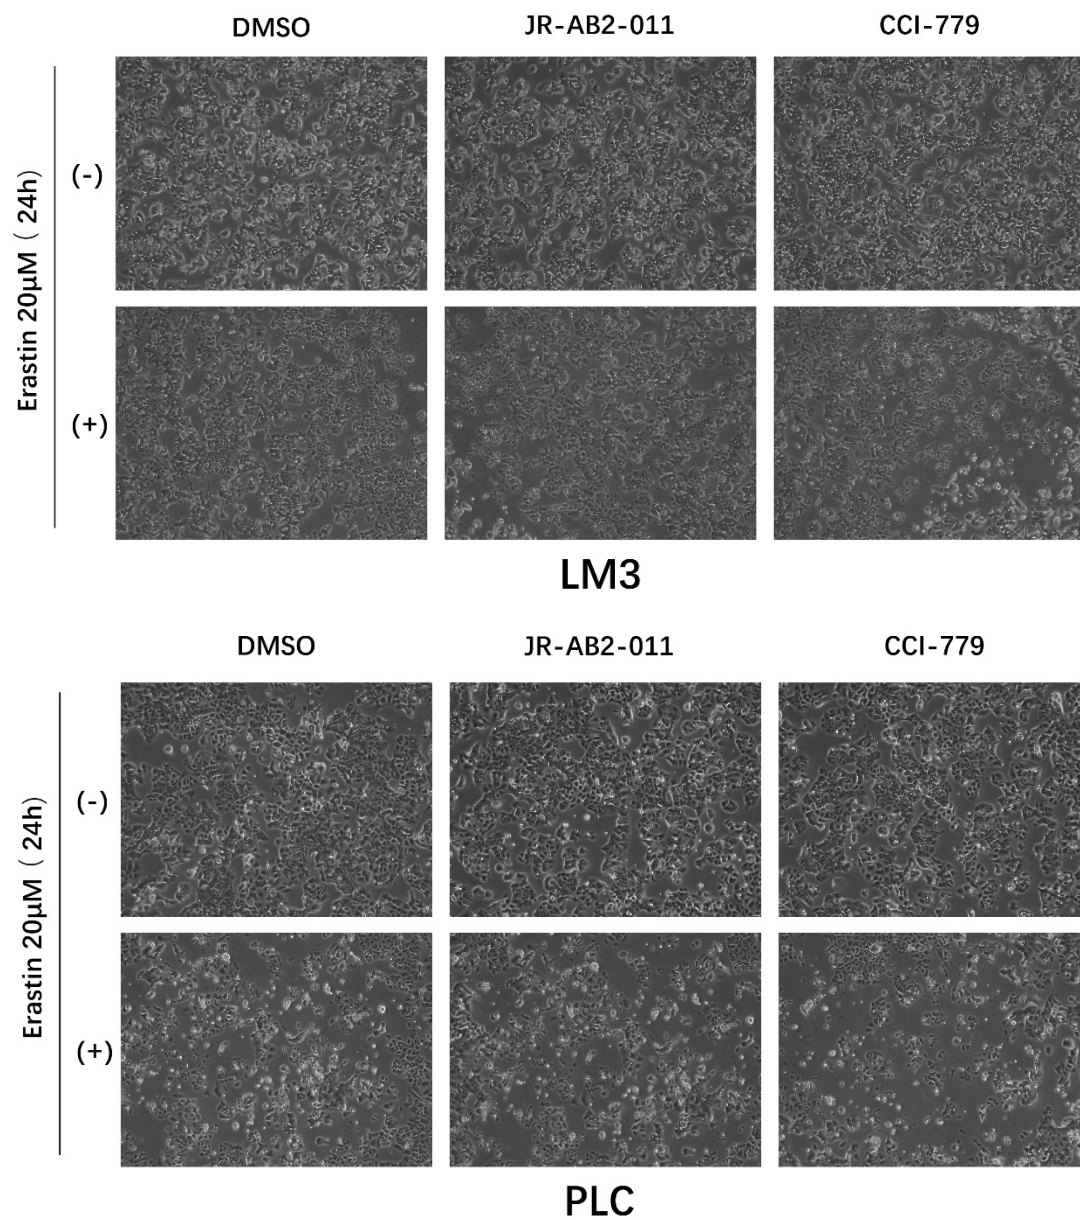

**Figure S5.** HCCLM3 and PLC cells were treated with 20 $\mu$ M erastin or untreated and treated with DMSO, JR-AB2-001 and CCI-779, respectively.

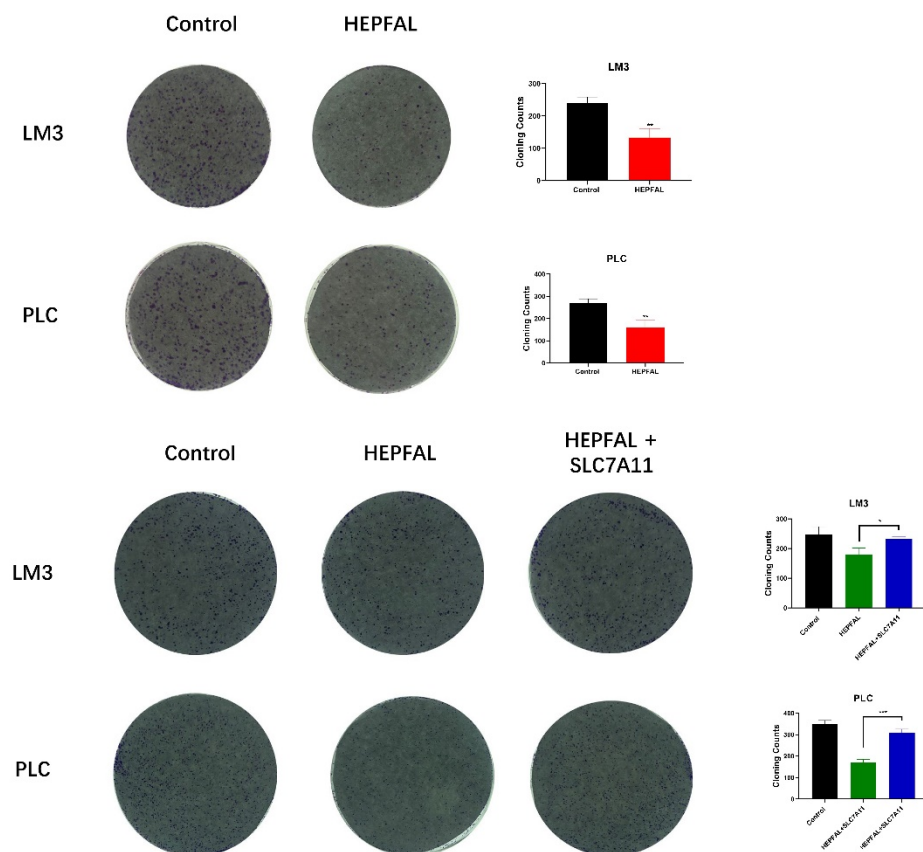

**Figure S6.** the number of colonies of LM3 and PLC cells after transfected as indicated.

Your input sequence is:

TAGACCACAGGGAGGCCTGGGAACTGCCTGAGCACCTGCACCA  
CGGGAGA GGCTTGGGTGACACTTGGGCACCTGCACCCAACACA  
GGTAGCAGTGATCA CAGTGAAAACATTTTGTAGCAGTCGTCTGC  
TTCCTGTCCTGGCATGAGC AGCAACGGGTAAAGGGCACTCTTGT  
CAGCTGAGGGGATGAGTGGGGCTCT GCCCAGCTGGTTGGAGAC  
TCCAGCAGGTTTGCAGGAGGAGACGGAAGAGC AAGGAGTGGAG  
GCAAAAACCTGCTGCCAAGATCCTGTGGGAAAACAGGAAC CAAA  
GAAGGAACTCCAATGGGAACTAATTTAGACAACAATGATCTTAA  
GTTTTTGCTCCTTCGAGACTGTTGAAAAGAACTCCCACGAGTGAA  
CAAAAGACGCCTGGCCGAGGACACTCCAGAGTGCTGTCACGAG  
GGTTCCCTGCA GTTTTCAGAACTTGGAGCATGTGGCCACAGCG  
GCTTGCACGTGATTCAT ACGGCACATCTTGTCAACCATGTAAATGTT  
TATCAGCAGAGACAAAGACCA GAAGAGCAACCTTGGAAGAGCT  
AAATATTCCGATGTTCCAGCATTTTCC CCTCTGGTTTGTATTGTGA  
ATTTTAAAATCTCGATTGACAAGT

----- IncLocator Prediction Result -----

| Subcellular locations | score           |
|-----------------------|-----------------|
| Cytoplasm             | 0.585413276878  |
| Nucleus               | 0.0907816604298 |
| Ribosome              | 0.101696991218  |
| Cytosol               | 0.130737666977  |
| Exosome               | 0.0913704044975 |

**Predicted  
location**

**Cytoplasm**

**Figure S7.** The predicted location of lncRNA HEPFAL.

**Table S1.** Sequences of the primers used for quantitative real-time PCR.

| Gene          | Forward primer(5'-3')   | Reverse primer(5'-3')   |
|---------------|-------------------------|-------------------------|
| SLC7A11       | CCATGAACGGTGGTGTGTT     | GACCCTCTCGAGACGCAAC     |
| lncRNA HEPFAL | CGGGTAAAGGGCACTCTTGTCAG | TCCACTCCTTGCTCTTCCGTCTC |
| GAPDH         | CAAGGTCATCCATGACAAC TTG | GTCCACCACCCTGTTGCTGTAG  |
